# Supplementary material for: Effects of Anthropogenic Disturbance and Seasonal Variation on Aerobiota in Highly Visited Show Caves in Slovenia
Source: MDPI journal article supplement (doi:10.3390/microorganisms11102381), 2023-09-23
Supplement: s1 [file s1]

**Table S1:** Bacterial and fungal isolates (MALDI Score  $\geq 2.00$ ) from the Lepe jame sampling site in Postojnska jama. Concentrations (CFU/m<sup>3</sup>) and percentages (%) of isolates based on flow cytometry results.

|                                   |                 | Lepe jame (CFU/m <sup>3</sup> (%)) |               |             |                |                 |                  |                |                  |
|-----------------------------------|-----------------|------------------------------------|---------------|-------------|----------------|-----------------|------------------|----------------|------------------|
| Bacteria                          |                 | February<br>2017                   | March<br>2017 | May<br>2017 | August<br>2017 | October<br>2017 | Decembre<br>2017 | August<br>2018 | Novembre<br>2018 |
| <i>Aerococcus viridans</i>        | Before tourists | NP                                 | NP            | NP          | NP             | NP              | NP               | NP             | NP               |
|                                   | After tourists  | NP                                 | NP            | NP          | NP             | NP              | NP               | 15 (0.19)      | NP               |
| <i>Arthrobacter oxydans</i>       | Before tourists | NP                                 | NP            | NP          | NP             | NP              | NP               | NP             | NP               |
|                                   | After tourists  | NP                                 | 17 (0.04)     | NP          | NP             | NP              | NP               | NP             | NP               |
| <i>Arthrobacter tumbae</i>        | Before tourists | NP                                 | 17 (0.06)     | NP          | NP             | NP              | NP               | NP             | NP               |
|                                   | After tourists  | NP                                 | NP            | NP          | NP             | NP              | NP               | NP             | NP               |
| <i>Bacillus cereus</i>            | Before tourists | NP                                 | 17 (0.06)     | NP          | NP             | NP              | NP               | NP             | 4 (0.05)         |
|                                   | After tourists  | NP                                 | NP            | NP          | NP             | NP              | 17 (0.27)        | NP             | NP               |
| <i>Bacillus pumilus</i>           | Before tourists | NP                                 | NP            | NP          | 17 (0.04)      | NP              | NP               | NP             | NP               |
|                                   | After tourists  | NP                                 | 17 (0.04)     | NP          | 17 (0.04)      | NP              | NP               | NP             | NP               |
| <i>Bacillus simplex</i>           | Before tourists | NP                                 | NP            | NP          | 17 (0.04)      | NP              | NP               | NP             | NP               |
|                                   | After tourists  | NP                                 | NP            | NP          | NP             | NP              | 17 (0.27)        | NP             | NP               |
| <i>Brevibacterium aurantiacum</i> | Before tourists | NP                                 | NP            | NP          | NP             | NP              | NP               | NP             | NP               |
|                                   | After tourists  | NP                                 | NP            | NP          | 17 (0.04)      | NP              | NP               | NP             | NP               |
| <i>Brevibacterium</i> sp.         | Before tourists | NP                                 | NP            | NP          | NP             | NP              | 67 (0.73)        | NP             | NP               |
|                                   | After tourists  | NP                                 | 17 (0.04)     | NP          | 17 (0.04)      | NP              | NP               | NP             | NP               |
| <i>Brevundimonas intermedia</i>   | Before tourists | NP                                 | NP            | NP          | NP             | NP              | 17 (0.19)        | NP             | NP               |
|                                   | After tourists  | NP                                 | NP            | NP          | NP             | NP              | NP               | NP             | NP               |
| <i>Chryseobacterium</i> sp.       | Before tourists | NP                                 | NP            | NP          | 17 (0.04)      | NP              | NP               | NP             | NP               |
|                                   | After tourists  | NP                                 | NP            | NP          | NP             | NP              | NP               | NP             | NP               |
| <i>Jeotgalicoccus</i> sp.         | Before tourists | NP                                 | NP            | NP          | NP             | NP              | NP               | NP             | NP               |
|                                   | After tourists  | NP                                 | NP            | NP          | 17 (0.04)      | NP              | NP               | NP             | NP               |



|                                    |                 |           |           |    |            |           |          |           |           |
|------------------------------------|-----------------|-----------|-----------|----|------------|-----------|----------|-----------|-----------|
|                                    | After tourists  | 50 (0.76) | NP        | NP | 117 (0.28) | NP        | NP       | NP        | NP        |
| <i>Staphylococcus equorum</i>      | Before tourists | NP        | NP        | NP | NP         | NP        | NP       | NP        | NP        |
|                                    | After tourists  | NP        | 17 (0.04) | NP | 67 (0.16)  | NP        | NP       | NP        | NP        |
| <i>Staphylococcus haemolyticus</i> | Before tourists | NP        | NP        | NP | NP         | NP        | NP       | NP        | NP        |
|                                    | After tourists  | NP        | NP        | NP | NP         | NP        | 6 (0.09) | NP        | NP        |
| <i>Staphylococcus lugdunensis</i>  | Before tourists | NP        | NP        | NP | NP         | NP        | NP       | NP        | NP        |
|                                    | After tourists  | NP        | NP        | NP | 17 (0.04)  | NP        | NP       | NP        | NP        |
| <i>Staphylococcus sp.</i>          | Before tourists | NP        | NP        | NP | NP         | NP        | NP       | NP        | NP        |
|                                    | After tourists  | NP        | NP        | NP | NP         | NP        | NP       | 8 (0.10)  | NP        |
| <i>Staphylococcus warneri</i>      | Before tourists | NP        | NP        | NP | NP         | NP        | THI      | NP        | NP        |
|                                    | After tourists  | NP        | NP        | NP | NP         | NP        | THI      | NP        | NP        |
| <i>Streptococcus mitis</i>         | Before tourists | NP        | NP        | NP | NP         | NP        | NP       | NP        | 17 (0.20) |
|                                    | After tourists  | NP        | NP        | NP | NP         | NP        | NP       | NP        | NP        |
| <i>Streptomyces lavendulae</i>     | Before tourists | NP        | NP        | NP | NP         | 33 (0.14) | NP       | NP        | NP        |
|                                    | After tourists  | NP        | NP        | NP | NP         | NP        | NP       | NP        | NP        |
| <i>Streptomyces sp.</i>            | Before tourists | NP        | NP        | NP | NP         | NP        | NP       | 8 (0.08)  | NP        |
|                                    | After tourists  | NP        | NP        | NP | NP         | NP        | NP       | NP        | NP        |
| <i>Viridibacillus sp.</i>          | Before tourists | NP        | NP        | NP | NP         | NP        | NP       | NP        | NP        |
|                                    | After tourists  | NP        | NP        | NP | NP         | NP        | NP       | 17 (0.21) | NP        |
| <b>Fungi</b>                       |                 |           |           |    |            |           |          |           |           |
| <i>Aspergillus fumigatus</i>       | Before tourists | 17 (0.26) | NP        | NP | NP         | NP        | NP       | NP        | NP        |
|                                    | After tourists  | NP        | NP        | NP | NP         | NP        | NP       | NP        | NP        |
| <i>Aureobasidium pullulans</i>     | Before tourists | NP        | NP        | NP | 33 (0.08)  | NP        | NP       | NP        | NP        |
|                                    | After tourists  | NP        | NP        | NP | NP         | NP        | NP       | NP        | NP        |
| <i>Naganishia diffluens</i>        | Before tourists | NP        | NP        | NP | NP         | NP        | NP       | NP        | NP        |
|                                    | After tourists  | NP        | NP        | NP | NP         | THI       | NP       | NP        | NP        |
| <i>Paecilomyces variotii</i>       | Before tourists | NP        | NP        | NP | NP         | NP        | NP       | NP        | NP        |
|                                    | After tourists  | 17 (0.26) | NP        | NP | NP         | NP        | NP       | NP        | NP        |

| Summary of microbial identification for all sampling campaigns      |                 |           |           |           |            |           |            |           |           |
|---------------------------------------------------------------------|-----------------|-----------|-----------|-----------|------------|-----------|------------|-----------|-----------|
| Non-identified microorganisms                                       | Before tourists | 34 (0.52) | 34 (0.11) | 50 (0.48) | 149 (0.36) | 80 (0.35) | 337 (3.70) | 8 (0.08)  | NP        |
|                                                                     | After tourists  | 94 (1.42) | 34 (0.08) | 17 (0.13) | 200 (0.48) | 17 (0.21) | 153 (2.41) | 34 (0.43) | 17 (0.04) |
| Sum (before tourists)                                               | Before tourists | 51        | 93        | 67        | 400        | 113       | 421        | 17        | 40        |
| Sum (after tourists)                                                | After tourists  | 188       | 169       | 51        | 787        | 68        | 327        | 173       | 100       |
| % of identified species                                             | Before tourists | 33.3      | 63.4      | 25.4      | 62.8       | 29.2      | 20.0       | 52.9      | 100       |
|                                                                     | After tourists  | 50.0      | 79.9      | 66.7      | 74.6       | 75.0      | 53.2       | 80.3      | 83        |
| Quotient of concentration between after vs. before tourists samples |                 | 3.7       | 1.8       | 0.8       | 2.0        | 0.6       | 0.8        | 10.2      | 2.5       |

THI – Thioglycollate broth; NP – not present

**Table S2:** Bacterial and fungal isolates (MALDI Score  $\geq 2.00$ ) from the Vivarium sampling site in Postojnska jama. Concentrations (CFU/m<sup>3</sup>) and percentages (%) of isolates based on flow cytometry results.

|                                     |                 | Vivarium (CFU/m <sup>3</sup> (%)) |           |             |              |               |             |               |
|-------------------------------------|-----------------|-----------------------------------|-----------|-------------|--------------|---------------|-------------|---------------|
| Bacteria                            |                 | March 2017                        | May 2017  | August 2017 | October 2017 | Decembre 2017 | August 2018 | Novembre 2018 |
| <i>Acinetobacter lwoffii</i>        | Before tourists | NP                                | NP        | NP          | NP           | NP            | NP          | NP            |
|                                     | After tourists  | NP                                | 33 (0.25) | 33 (0.07)   | NP           | NP            | NP          | 33 (0.22)     |
| <i>Aerococcus viridans</i>          | Before tourists | NP                                | 17 (0.19) | 33 (0.08)   | NP           | NP            | NP          | NP            |
|                                     | After tourists  | NP                                | NP        | NP          | NP           | NP            | NP          | NP            |
| <i>Arthrobacter</i> sp.             | Before tourists | NP                                | NP        | NP          | 86 (1.61)    | NP            | NP          | NP            |
|                                     | After tourists  | NP                                | NP        | NP          | NP           | NP            | NP          | NP            |
| <i>Arthrobacter polychromogenes</i> | Before tourists | NP                                | NP        | NP          | NP           | NP            | NP          | NP            |
|                                     | After tourists  | NP                                | NP        | 50 (0.11)   | NP           | NP            | NP          | NP            |

|                                    |                 |           |              |           |           |           |           |           |
|------------------------------------|-----------------|-----------|--------------|-----------|-----------|-----------|-----------|-----------|
| <i>Bacillus cereus</i>             | Before tourists | NP        | NP           | NP        | NP        | NP        | NP        | 3 (0.03)  |
|                                    | After tourists  | 17 (0.02) | NP           | NP        | 86 (0.94) | NP        | NP        | NP        |
| <i>Bacillus sp.</i>                | Before tourists | NP        | NP           | 17 (0.04) | NP        | NP        | 11 (0.18) | NP        |
|                                    | After tourists  | NP        | NP           | NP        | NP        | NP        | NP        | NP        |
| <i>Bacillus licheniformis</i>      | Before tourists | NP        | NP           | NP        | NP        | NP        | NP        | NP        |
|                                    | After tourists  | NP        | 33<br>(0.25) | NP        | 84 (0.92) | THI       | NP        | NP        |
| <i>Bacillus pumilus</i>            | Before tourists | NP        | NP           | NP        | NP        | NP        | NP        | NP        |
|                                    | After tourists  | NP        | NP           | NP        | 84 (0.92) | NP        | NP        | NP        |
| <i>Bacillus simplex</i>            | Before tourists | NP        | NP           | 17 (0.04) | NP        | NP        | NP        | NP        |
|                                    | After tourists  | 17 (0.02) | NP           | NP        | NP        | NP        | NP        | NP        |
| <i>Brevibacterium aurantiacum</i>  | Before tourists | NP        | NP           | NP        | NP        | NP        | NP        | NP        |
|                                    | After tourists  | 33 (0.05) | NP           | NP        | NP        | NP        | NP        | NP        |
| <i>Brevundimonas intermedia</i>    | Before tourists | NP        | NP           | NP        | NP        | NP        | NP        | NP        |
|                                    | After tourists  | NP        | NP           | NP        | NP        | 17 (0.11) | NP        | NP        |
| <i>Citricoccus nitrophenolicus</i> | Before tourists | NP        | NP           | NP        | NP        | NP        | NP        | NP        |
|                                    | After tourists  | NP        | NP           | NP        | NP        | NP        | NP        | 1 (0.01)  |
| <i>Dermacoccus sp.</i>             | Before tourists | NP        | NP           | NP        | NP        | NP        | NP        | NP        |
|                                    | After tourists  | NP        | 33<br>(0.25) | NP        | NP        | NP        | NP        | NP        |
| <i>Dietzia maris</i>               | Before tourists | 2 (0.004) | NP           | NP        | NP        | NP        | NP        | NP        |
|                                    | After tourists  | NP        | NP           | NP        | NP        | NP        | NP        | NP        |
| <i>Dietzia sp.</i>                 | Before tourists | NP        | NP           | NP        | NP        | NP        | NP        | NP        |
|                                    | After tourists  | 17 (0.02) | NP           | NP        | NP        | NP        | NP        | NP        |
| <i>Glutamicibacter bergerei</i>    | Before tourists | NP        | NP           | NP        | NP        | NP        | NP        | NP        |
|                                    | After tourists  | NP        | NP           | NP        | NP        | NP        | NP        | 17 (0.11) |
| <i>Kocuria rhizophila</i>          | Before tourists | NP        | NP           | NP        | NP        | NP        | NP        | NP        |
|                                    | After tourists  | NP        | 17<br>(0.13) | NP        | NP        | NP        | NP        | NP        |
| <i>Kytococcus sedentarius</i>      | Before tourists | 3 (0.006) | NP           | NP        | NP        | NP        | NP        | NP        |

|                                    |                 |           |            |            |            |           |           |            |
|------------------------------------|-----------------|-----------|------------|------------|------------|-----------|-----------|------------|
|                                    | After tourists  | NP        | NP         | 17 (0.04)  | NP         | NP        | NP        | NP         |
|                                    | Before tourists | 17 (0.03) | 17 (0.19)  | 7 (0.02)   | NP         | 33 (0.12) | NP        | 5 (0.05)   |
| <i>Micrococcus luteus</i>          | After tourists  | 33 (0.05) | 618 (4.60) | 150 (0.32) | 150 (1.64) | NP        | 17 (0.25) | 117 (0.78) |
|                                    | Before tourists | NP        | NP         | NP         | NP         | NP        | NP        | NP         |
| <i>Pantoea agglomerans</i>         | After tourists  | NP        | NP         | THI        | NP         | NP        | NP        | NP         |
|                                    | Before tourists | 17 (0.03) | NP         | NP         | NP         | 33 (0.12) | NP        | NP         |
| <i>Paracoccus yeei</i>             | After tourists  | NP        | 17 (0.13)  | NP         | NP         | NP        | NP        | NP         |
|                                    | Before tourists | NP        | NP         | NP         | NP         | 84 (0.29) | NP        | NP         |
| <i>Pseudomonas sp.</i>             | After tourists  | NP        | NP         | NP         | NP         | NP        | NP        | NP         |
|                                    | Before tourists | NP        | NP         | NP         | NP         | NP        | NP        | NP         |
| <i>Psychrobacillus sp.</i>         | After tourists  | NP        | NP         | NP         | 33 (0.36)  | NP        | NP        | NP         |
|                                    | Before tourists | NP        | NP         | NP         | NP         | NP        | NP        | NP         |
| <i>Psychrobacter sp.</i>           | After tourists  | NP        | NP         | NP         | NP         | NP        | NP        | 33 (0.22)  |
|                                    | Before tourists | NP        | 17 (0.19)  | NP         | NP         | NP        | NP        | NP         |
| <i>Rhodococcus fascians</i>        | After tourists  | NP        | NP         | NP         | NP         | NP        | NP        | NP         |
|                                    | Before tourists | NP        | NP         | NP         | NP         | NP        | NP        | NP         |
| <i>Rothia aeria</i>                | After tourists  | NP        | NP         | NP         | NP         | NP        | NP        | 33 (0.22)  |
|                                    | Before tourists | NP        | NP         | NP         | NP         | NP        | NP        | NP         |
| <i>Sporosarcina sp.</i>            | After tourists  | NP        | NP         | NP         | NP         | NP        | NP        | 17 (0.11)  |
|                                    | Before tourists | 17 (0.03) | NP         | NP         | NP         | NP        | NP        | NP         |
| <i>Staphylococcus epidermidis</i>  | After tourists  | NP        | NP         | NP         | NP         | NP        | NP        | NP         |
|                                    | Before tourists | NP        | NP         | NP         | NP         | NP        | NP        | NP         |
| <i>Staphylococcus equorum</i>      | After tourists  | NP        | 50 (0.37)  | 33 (0.07)  | NP         | NP        | NP        | 33 (0.22)  |
|                                    | Before tourists | NP        | NP         | NP         | NP         | NP        | NP        | NP         |
| <i>Staphylococcus haemolyticus</i> | After tourists  | NP        | 17 (0.13)  | NP         | NP         | NP        | NP        | NP         |

|                                                                       |                 |            |               |           |            |            |           |            |
|-----------------------------------------------------------------------|-----------------|------------|---------------|-----------|------------|------------|-----------|------------|
| <i>Staphylococcus lugdunensis</i>                                     | Before tourists | NP         | NP            | NP        | NP         | NP         | THI       | NP         |
|                                                                       | After tourists  | 33 (0.05)  | NP            | NP        | NP         | NP         | NP        | NP         |
| <i>Staphylococcus saprophyticus</i>                                   | Before tourists | NP         | NP            | NP        | NP         | NP         | NP        | NP         |
|                                                                       | After tourists  | NP         | 17<br>(0.13)  | NP        | NP         | NP         | NP        | NP         |
| <i>Staphylococcus warneri</i>                                         | Before tourists | NP         | NP            | NP        | NP         | 5 (0.02)   | NP        | NP         |
|                                                                       | After tourists  | NP         | NP            | NP        | NP         | 8 (0.05)   | NP        | NP         |
| <i>Streptococcus pseudopneumoniae</i>                                 | Before tourists | NP         | NP            | NP        | NP         | NP         | NP        | NP         |
|                                                                       | After tourists  | NP         | NP            | NP        | NP         | NP         | NP        | 301 (1.99) |
| <b>Fungi</b>                                                          |                 |            |               |           |            |            |           |            |
| <i>Aspergillus versicolor</i>                                         | Before tourists | NP         | NP            | NP        | NP         | NP         | NP        | 217 (2.37) |
|                                                                       | After tourists  | NP         | NP            | NP        | NP         | NP         | NP        | 267 (1.77) |
| <i>Cutaneotrichosporon curvatum</i>                                   | Before tourists | NP         | NP            | NP        | NP         | NP         | NP        | NP         |
|                                                                       | After tourists  | NP         | NP            | NP        | NP         | NP         | 7 (0.10)  | NP         |
| <i>Debaryomyces hansenii</i>                                          | Before tourists | NP         | NP            | NP        | NP         | NP         | NP        | NP         |
|                                                                       | After tourists  | 33 (0.05)  | NP            | NP        | NP         | NP         | NP        | NP         |
| <i>Naganishia diffluens</i>                                           | Before tourists | NP         | NP            | NP        | NP         | NP         | NP        | NP         |
|                                                                       | After tourists  | NP         | NP            | NP        | THI        | NP         | NP        | NP         |
| <i>Naganishia liquefaciens</i>                                        | Before tourists | 2 (0.004)  | NP            | NP        | NP         | NP         | NP        | NP         |
|                                                                       | After tourists  | NP         | NP            | NP        | NP         | NP         | NP        | NP         |
| <i>Rhodotorula mucilaginosa</i>                                       | Before tourists | NP         | NP            | NP        | NP         | NP         | NP        | NP         |
|                                                                       | After tourists  | NP         | NP            | 1 (0.002) | NP         | NP         | NP        | NP         |
| <b>Summary of microbial identification for all sampling campaigns</b> |                 |            |               |           |            |            |           |            |
| Non-identified microorganisms                                         | Before tourists | 85 (0.17)  | 101<br>(1.14) | NP        | 557 (4.52) | 167 (0.58) | NP        | 1 (0.01)   |
|                                                                       | After tourists  | 143 (0.20) | 452<br>(3.37) | 49 (0.12) | 349 (3.82) | 34 (0.23)  | 57 (0.82) | 68 (0.45)  |
| Sum (before tourists)                                                 | Before tourists | 143        | 152           | 74        | 643        | 322        | 11        | 226        |
| Sum (after tourists)                                                  | After tourists  | 326        | 1287          | 333       | 786        | 59         | 81        | 920        |

|                                                                     |                 |      |      |       |      |      |       |      |
|---------------------------------------------------------------------|-----------------|------|------|-------|------|------|-------|------|
| % of identified species                                             | Before tourists | 40.6 | 33.6 | 100.0 | 13.4 | 48.1 | 100.0 | 99.6 |
|                                                                     | After tourists  | 56.1 | 64.9 | 85.3  | 55.6 | 42.4 | 29.6  | 92.6 |
| Quotient of concentration between after vs. before tourists samples |                 | 2.3  | 8.5  | 4.5   | 1.2  | 0.2  | 7.4   | 4.1  |

THI – Thioglycollate broth; NP – not present

**Tabele S3:** Bacterial and fungal isolates (MALDI Score  $\geq 2.00$ ) from the Šotor sampling site in Škocjanske jame. Concentrations (CFU/m<sup>3</sup>) and percentages (%) of isolates based on flow cytometry results.

|                                     |                 | Šotor (CFU/m <sup>3</sup> (%)) |               |              |                |                 |                  |                |                  |
|-------------------------------------|-----------------|--------------------------------|---------------|--------------|----------------|-----------------|------------------|----------------|------------------|
| Genus                               |                 | February<br>2017               | March<br>2017 | May<br>2017  | August<br>2017 | October<br>2017 | Decembre<br>2017 | August<br>2018 | Novembre<br>2018 |
| <i>Acinetobacter guillouiae</i>     | Before tourists | NP                             | NP            | NP           | NP             | 7 (0.05)        | NP               | NP             | NP               |
|                                     | After tourists  | NP                             | NP            | NP           | NP             | NP              | NP               | NP             | NP               |
| <i>Acinetobacter</i> sp.            | Before tourists | NP                             | NP            | NP           | NP             | NP              | NP               | NP             | NP               |
|                                     | After tourists  | NP                             | NP            | 17<br>(0.16) | 17 (0.04)      | NP              | NP               | NP             | NP               |
| <i>Acinetobacter johnsonii</i>      | Before tourists | NP                             | NP            | NP           | 17 (0.04)      | NP              | NP               | NP             | NP               |
|                                     | After tourists  | NP                             | NP            | NP           | NP             | NP              | NP               | NP             | NP               |
| <i>Acinetobacter lwoffii</i>        | Before tourists | NP                             | NP            | NP           | NP             | NP              | NP               | NP             | NP               |
|                                     | After tourists  | NP                             | NP            | NP           | 6              | 17 (0.25)       | NP               | 17 (0.11)      | NP               |
| <i>Aerococcus viridans</i>          | Before tourists | NP                             | NP            | NP           | NP             | NP              | NP               | THI            | NP               |
|                                     | After tourists  | NP                             | NP            | NP           | 33 (0.07)      | NP              | NP               | NP             | NP               |
| <i>Arthrobacter oxydans</i>         | Before tourists | NP                             | NP            | NP           | NP             | 17 (0.11)       | NP               | NP             | NP               |
|                                     | After tourists  | NP                             | NP            | NP           | NP             | NP              | NP               | NP             | NP               |
| <i>Arthrobacter polychromogenes</i> | Before tourists | NP                             | NP            | NP           | NP             | NP              | NP               | 8 (0.03)       | NP               |
|                                     | After tourists  | NP                             | NP            | NP           | 17 (0.04)      | NP              | NP               | NP             | NP               |
| <i>Arthrobacter sulfonivorans</i>   | Before tourists | NP                             | NP            | NP           | NP             | NP              | NP               | NP             | NP               |
|                                     | After tourists  | NP                             | NP            | NP           | 33 (0.07)      | NP              | NP               | NP             | NP               |



|                               |                 |            |           |              |           |           |           |           |           |
|-------------------------------|-----------------|------------|-----------|--------------|-----------|-----------|-----------|-----------|-----------|
| <i>Bacillus cereus</i>        | Before tourists | NP         | NP        | 17<br>(0.16) | NP        | NP        | NP        | NP        | NP        |
|                               | After tourists  | NP         | NP        | 17<br>(0.16) | NP        | NP        | NP        | NP        | NP        |
| <i>Bacillus licheniformis</i> | Before tourists | NP         | NP        | NP           | NP        | NP        | NP        | NP        | NP        |
|                               | After tourists  | 117 (0.48) | NP        | NP           | NP        | NP        | NP        | NP        | NP        |
| <i>Bacillus</i> sp.           | Before tourists | NP         | NP        | NP           | NP        | NP        | NP        | THI       | NP        |
|                               | After tourists  | NP         | NP        | NP           | NP        | NP        | 17 (0.24) | NP        | NP        |
| <i>Bacillus muralis</i>       | Before tourists | NP         | NP        | NP           | NP        | NP        | NP        | NP        | NP        |
|                               | After tourists  | NP         | NP        | NP           | 17 (0.04) | NP        | NP        | NP        | NP        |
| <i>Bacillus novalis</i>       | Before tourists | NP         | NP        | NP           | NP        | NP        | NP        | NP        | 1 (0.008) |
|                               | After tourists  | NP         | NP        | NP           | NP        | NP        | NP        | NP        | NP        |
| <i>Bacillus simplex</i>       | Before tourists | NP         | 7 (0.03)  | NP           | NP        | NP        | NP        | 8 (0.03)  | NP        |
|                               | After tourists  | NP         | 8 (0.03)  | NP           | 17 (0.04) | NP        | NP        | NP        | NP        |
| <i>Brevibacterium</i> sp.     | Before tourists | NP         | NP        | NP           | NP        | NP        | NP        | NP        | NP        |
|                               | After tourists  | NP         | NP        | NP           | NP        | THI       | NP        | NP        | NP        |
| <i>Dietzia maris</i>          | Before tourists | NP         | NP        | NP           | NP        | NP        | NP        | 8 (0.03)  | NP        |
|                               | After tourists  | NP         | NP        | NP           | NP        | NP        | NP        | NP        | NP        |
| <i>Kocuria</i> sp.            | Before tourists | NP         | NP        | NP           | 33 (0.07) | NP        | NP        | NP        | NP        |
|                               | After tourists  | NP         | NP        | NP           | NP        | NP        | NP        | NP        | NP        |
| <i>Kocuria rhizophila</i>     | Before tourists | NP         | NP        | NP           | NP        | NP        | NP        | NP        | NP        |
|                               | After tourists  | NP         | NP        | 17<br>(0.16) | NP        | NP        | NP        | 33 (0.22) | NP        |
| <i>Massilia timonae</i>       | Before tourists | NP         | NP        | NP           | NP        | NP        | NP        | NP        | NP        |
|                               | After tourists  | NP         | NP        | NP           | 17 (0.04) | NP        | NP        | NP        | NP        |
| <i>Microbacterium</i> sp.     | Before tourists | NP         | NP        | NP           | NP        | 17 (0.11) | NP        | NP        | NP        |
|                               | After tourists  | NP         | NP        | NP           | NP        | NP        | NP        | NP        | NP        |
| <i>Micrococcus</i> sp.        | Before tourists | NP         | NP        | NP           | NP        | NP        | NP        | NP        | NP        |
|                               | After tourists  | NP         | 17 (0.07) | NP           | NP        | NP        | NP        | NP        | NP        |
| <i>Micrococcus luteus</i>     | Before tourists | 50 (0.23)  | NP        | NP           | 67 (0.15) | NP        | THI       | 45 (0.18) | 33 (0.26) |

|                                     |                 |           |           |              |           |           |    |           |           |
|-------------------------------------|-----------------|-----------|-----------|--------------|-----------|-----------|----|-----------|-----------|
|                                     | After tourists  | 33 (0.14) | 18 (0.08) | 84<br>(0.81) | 67 (0.15) | 84 (1.22) | NP | 92 (0.60) | 83 (0.08) |
| <i>Pseudomonas antarctica</i>       | Before tourists | NP        | NP        | NP           | NP        | NP        | NP | NP        | NP        |
|                                     | After tourists  | 17 (0.07) | NP        | NP           | NP        | NP        | NP | NP        | NP        |
| <i>Pseudomonas extremorientalis</i> | Before tourists | NP        | NP        | NP           | NP        | NP        | NP | NP        | NP        |
|                                     | After tourists  | 33 (0.14) | NP        | NP           | NP        | NP        | NP | NP        | NP        |
| <i>Pseudomonas fluorescens</i>      | Before tourists | THI       | NP        | NP           | NP        | NP        | NP | NP        | NP        |
|                                     | After tourists  | NP        | NP        | NP           | NP        | NP        | NP | NP        | NP        |
| <i>Pseudomonas syriNPae</i>         | Before tourists | 33 (0.15) | NP        | NP           | NP        | NP        | NP | NP        | NP        |
|                                     | After tourists  | NP        | NP        | NP           | NP        | NP        | NP | NP        | NP        |
| <i>Pseudomonas tolaasii</i>         | Before tourists | NP        | NP        | NP           | NP        | NP        | NP | NP        | NP        |
|                                     | After tourists  | 33 (0.14) | NP        | NP           | NP        | NP        | NP | NP        | NP        |
| <i>Pseudomonas sp.</i>              | Before tourists | 17 (0.08) | NP        | NP           | NP        | NP        | NP | NP        | NP        |
|                                     | After tourists  | NP        | NP        | NP           | NP        | NP        | NP | NP        | NP        |
| <i>Rahnella aquatilis</i>           | Before tourists | 30 (0.14) | NP        | NP           | NP        | NP        | NP | NP        | NP        |
|                                     | After tourists  | NP        | NP        | NP           | NP        | NP        | NP | NP        | NP        |
| <i>Rhizobium rubi</i>               | Before tourists | NP        | NP        | NP           | NP        | NP        | NP | NP        | NP        |
|                                     | After tourists  | 17 (0.07) | NP        | NP           | NP        | NP        | NP | NP        | NP        |
| <i>Roseomonas mucosa</i>            | Before tourists | NP        | NP        | NP           | NP        | NP        | NP | NP        | 17 (0.14) |
|                                     | After tourists  | NP        | NP        | NP           | NP        | NP        | NP | NP        | 17 (0.02) |
| <i>Solibacillus sp.</i>             | Before tourists | NP        | NP        | NP           | NP        | NP        | NP | NP        | NP        |
|                                     | After tourists  | NP        | NP        | NP           | NP        | 4 (0.06)  | NP | NP        | NP        |
| <i>Sphingomonas sp.</i>             | Before tourists | NP        | NP        | NP           | NP        | NP        | NP | 8 (0.03)  | NP        |
|                                     | After tourists  | NP        | NP        | NP           | NP        | NP        | NP | NP        | NP        |
| <i>Staphylococcus epidermidis</i>   | Before tourists | NP        | NP        | 17<br>(0.16) | NP        | 17 (0.11) | NP | NP        | NP        |
|                                     | After tourists  | NP        | NP        | 33<br>(0.32) | NP        | NP        | NP | NP        | NP        |
| <i>Staphylococcus hominis</i>       | Before tourists | NP        | 8 (0.03)  | NP           | 33 (0.07) | NP        | NP | NP        | NP        |
|                                     | After tourists  | NP        | NP        | NP           | NP        | NP        | NP | NP        | NP        |

|                                                                           |                 |           |           |               |            |            |            |           |       |
|---------------------------------------------------------------------------|-----------------|-----------|-----------|---------------|------------|------------|------------|-----------|-------|
| <i>Staphylococcus saprophyticus</i>                                       | Before tourists | NP        | NP        | NP            | NP         | NP         | NP         | NP        | NP    |
|                                                                           | After tourists  | NP        | NP        | 17<br>(0.16)  | NP         | NP         | NP         | NP        | NP    |
| <i>Staphylococcus warneri</i>                                             | Before tourists | NP        | NP        | NP            | NP         | NP         | 3 (0.06)   | NP        | NP    |
|                                                                           | After tourists  | NP        | NP        | NP            | NP         | NP         | 4 (0.06)   | NP        | NP    |
| <i>Staphylococcus</i> sp.                                                 | Before tourists | 17 (0.08) |           | NP            | NP         | NP         | NP         | NP        | NP    |
|                                                                           | After tourists  | NP        | NP        | NP            | NP         | NP         | NP         | NP        | NP    |
| <i>Stenotrophomonas</i> sp.                                               | Before tourists | NP        | NP        | NP            | NP         | NP         | NP         | NP        | NP    |
|                                                                           | After tourists  | 50 (0.21) | NP        | NP            | NP         | NP         | NP         | NP        | NP    |
| <i>Streptomyces</i> sp.                                                   | Before tourists | NP        | NP        | NP            | NP         | 17 (0.11)  | NP         | NP        | NP    |
|                                                                           | After tourists  | NP        | NP        | NP            | NP         | NP         | NP         | NP        | NP    |
| <b>Fungi</b>                                                              |                 |           |           |               |            |            |            |           |       |
| <i>Aureobasidium pullulans</i>                                            | Before tourists | NP        | NP        | NP            | NP         | NP         | NP         | NP        | NP    |
|                                                                           | After tourists  | NP        | NP        | NP            | NP         | NP         | NP         | 17 (0.11) | NP    |
| <i>Cutaneotrichosporon curvatum</i>                                       | Before tourists | NP        | NP        | NP            | NP         | NP         | NP         | NP        | NP    |
|                                                                           | After tourists  | NP        | NP        | NP            | 17 (0.04)  | 33 (0.48)  | NP         | 25 (0.16) | NP    |
| <i>Naganishia liquefaciens</i>                                            | Before tourists | NP        | NP        | NP            | NP         | NP         | NP         | NP        | NP    |
|                                                                           | After tourists  | NP        | NP        | NP            | NP         | 50 (0.73)  | NP         | NP        | NP    |
| <i>Rhodotorula mucilaginosa</i>                                           | Before tourists | NP        | NP        | NP            | NP         | NP         | NP         | NP        | NP    |
|                                                                           | After tourists  | NP        | NP        | NP            | 33 (0.07)  | NP         | NP         | NP        | NP    |
| <b>Summary of microbial identification<br/>for all sampling campaigns</b> |                 |           |           |               |            |            |            |           |       |
| Non-identified microorganisms                                             | Before tourists | 68 (0.32) | 50 (0.19) | 17<br>(0.16)  | 101 (0.22) | 318 (2.15) | 17 (0.35)  | NP        | NP    |
|                                                                           | After tourists  | 27 (0.11) | 17 (0.07) | 150<br>(1.45) | 185 (0.41) | 351 (5.10) | 101 (1.41) | 34 (0.22) | NP    |
| Sum (before tourists)                                                     | Before tourists | 215       | 65        | 51            | 251        | 393        | 20         | 77        | 51    |
| Sum (after tourists)                                                      | After tourists  | 327       | 60        | 335           | 459        | 539        | 122        | 218       | 100   |
| % of identified species                                                   | Before tourists | 68,4      | 23,1      | 66,7          | 59,8       | 19,1       | 15,0       | 100,0     | 100,0 |
|                                                                           | After tourists  | 91,7      | 71,7      | 55,2          | 59,7       | 34,9       | 17,2       | 84,4      | 100,0 |

|                                                                     |     |     |     |     |     |     |     |     |
|---------------------------------------------------------------------|-----|-----|-----|-----|-----|-----|-----|-----|
| Quotient of concentration between after vs. before tourists samples | 1,5 | 0,9 | 6,6 | 1,8 | 1,4 | 6,1 | 2,8 | 2,0 |
|---------------------------------------------------------------------|-----|-----|-----|-----|-----|-----|-----|-----|

THI – Thioglycollate broth; NP – not present

**Table S4:** Bacterial isolates (MALDI Score  $\geq 2.00$ ) from the sampling sites Lepe jame and Vivarium in Postojnska jama and from the sampling site Šotor in Škocjanske jame, their risk group assignment and typical habitat. Concentrations (CFU/m<sup>3</sup>) and percentages (%) of isolates based on flow cytometry results.

| Bacterial species                   | Lepe jame                         |                | Vivarium                          |                | Šotor                             |                | Locations Combined             |                | Risk Group     | Typical Habitat                                      |
|-------------------------------------|-----------------------------------|----------------|-----------------------------------|----------------|-----------------------------------|----------------|--------------------------------|----------------|----------------|------------------------------------------------------|
|                                     | Bacteria (CFU/m <sup>3</sup> (%)) |                | Bacteria (CFU/m <sup>3</sup> (%)) |                | Bacteria (CFU/m <sup>3</sup> (%)) |                | Bacteria (CFU/m <sup>3</sup> ) |                |                |                                                      |
|                                     | Before tourists                   | After tourists | Before tourists                   | After tourists | Before tourists                   | After tourists | Before tourists                | After tourists |                |                                                      |
| <i>Acinetobacter guillouiae</i>     | NP                                | NP             | NP                                | NP             | 7 (0.62)                          | NP             | 0-7                            | NP             | -              | ubiquitous, gasworks, humans (skin)                  |
| <i>Acinetobacter johnsonii</i>      | NP                                | NP             | NP                                | NP             | 17                                | NP             | 0-17                           | NP             | 2 (AU, CH, DE) | humans (skin), animals, activated sludge, food       |
| <i>Acinetobacter lwoffii</i>        | NP                                | NP             | NP                                | 99 (2.61)      | NP                                | 40 (1.85)      | NP                             | 0-99           | 2 (AU, CH, DE) | ubiquitous, food, humans (skin)                      |
| <i>Aerococcus viridans</i>          | NP                                | 15 (0.81)      | 50 (3.18)                         | NP             | NP                                | 33 (1.53)      | 0-50                           | 0-33           | 2 (BE, CH, DE) | Humans (urinary tract), animals (lobsters), seawater |
| <i>Arthrobacter oxydans</i>         | NP                                | 17 (0.91)      | NP                                | NP             | 17 (1.51)                         | NP             | 0-17                           | 0-17           | -              | ubiquitous, soil, plants                             |
| <i>Arthrobacter polychromogenes</i> | NP                                | NP             | NP                                | 50 (1.32)      | 8 (0.71)                          | 17 (0.79)      | 0-8                            | 0-50           | -              | ubiquitous, soil, plants                             |

|                                    |           |              |           |               |           |               |       |        |                          |                                            |
|------------------------------------|-----------|--------------|-----------|---------------|-----------|---------------|-------|--------|--------------------------|--------------------------------------------|
| <i>Arthrobacter sulfonivorans</i>  | NP        | NP           | NP        | NP            | NP        | 33<br>(1.53)  | NP    | 0-33   | -                        | ubiquitous, soil, plants                   |
| <i>Arthrobacter tumbae</i>         | 17 (1.41) | NP           | NP        | NP            | NP        | NP            | 0-17  | NP     | -                        | ubiquitous, soil, plants                   |
| <i>Bacillus cereus</i>             | 21 (1.75) | 17<br>(0.91) | 3 (0.19)  | 103<br>(2.72) | 17 (1.51) | 17<br>(0.79)  | 3-21  | 17-103 | 2 (AU,<br>CH, DE,<br>UK) | humans, soil, food                         |
| <i>Bacillus licheniformis</i>      | NP        | NP           | NP        | 117<br>(3.09) | NP        | 117<br>(5.42) | NP    | 0-117  | -                        | soil, food, animals (birds)                |
| <i>Bacillus megaterium</i>         | NP        | NP           | NP        | NP            | THI       | NP            | NP    | NP     | -                        | soil, seawater, food, animals<br>(insects) |
| <i>Bacillus novalis</i>            | NP        | NP           | NP        | NP            | 1 (0.09)  | NP            | 0-1   | NP     | -                        | soil, hay fields                           |
| <i>Bacillus pumilus</i>            | 17 (1.41) | 34<br>(1.83) | NP        | 84<br>(2.22)  | NP        | NP            | 0-17  | 0-84   | -                        | soil, animals, food (milk)                 |
| <i>Bacillus simplex</i>            | 17 (1.41) | 17<br>(0.91) | 17 (1.08) | 17<br>(0.45)  | 15 (1.34) | 25<br>(1.16)  | 15-17 | 17-25  | -                        | soil, plants                               |
| <i>Brevibacterium aurantiacum</i>  | NP        | 17<br>(0.91) | NP        | 33<br>(0.87)  | NP        | NP            | NP    | 0-33   | -                        | food (milk and cheese)                     |
| <i>Brevundimonas intermedia</i>    | 17 (1.41) | NP           | NP        | 17<br>(0.45)  | NP        | NP            | 0-17  | 0-17   | -                        | ubiquitous, seawater                       |
| <i>Citricoccus nitrophenolicus</i> | NP        | NP           | NP        | 1 (0.03)      | NP        | NP            | NP    | 0-1    | -                        | wastewater                                 |
| <i>Dietzia maris</i>               | NP        | NP           | 2 (0.13)  | NP            | 8 (0.71)  | NP            | 0-8   | NP     | -                        | humans, animals, seawater                  |
| <i>Glutamicibacter bergerei</i>    | NP        | NP           | NP        | 17<br>(0.45)  | NP        | NP            | NP    | 0-17   | -                        | soil                                       |
| <i>Kocuria rhizophila</i>          | 50 (4.16) | 17<br>(0.91) | NP        | 17<br>(0.45)  | NP        | 50<br>(2.31)  | 0-50  | 17-50  | -                        | Soil, sand, human and animal skin          |
| <i>Kytococcus sedentarius</i>      | NP        | 17<br>(0.91) | 3 (0.19)  | 17<br>(0.45)  | NP        | NP            | 0-3   | 0-17   | -                        | aquatic, humans (skin)                     |
| <i>Massilia timonae</i>            | NP        | NP           | NP        | NP            | NP        | 17<br>(0.79)  | NP    | 0-17   | -                        | Plants (maize), humans                     |
| <i>Microbacterium paraoxydans</i>  | NP        | THI          | NP        | NP            | NP        | NP            | NP    | NP     | -                        | Humans, plastic                            |

|                                         |               |               |           |                 |                |                |        |              |                           |                                              |
|-----------------------------------------|---------------|---------------|-----------|-----------------|----------------|----------------|--------|--------------|---------------------------|----------------------------------------------|
| <i>Micrococcus luteus</i>               | 153<br>(12.7) | 545<br>(29.3) | 79 (5.02) | 1085<br>(28.61) | 195<br>(17.36) | 461<br>(21.34) | 79-195 | 545-<br>1085 | 2 (BE,<br>CH, DE,<br>NIH) | soil, aquatic, air, human and<br>animal skin |
| <i>Moraxella osloensis</i>              | NP            | 42<br>(2.25)  | NP        | NP              | NP             | NP             | NP     | 0-42         | -                         | Human skin and mucosae                       |
| <i>Oerskovia turbata</i>                | NP            | 33<br>(1.77)  | NP        | NP              | NP             | NP             | NP     | 0-33         | -                         | Soil, human                                  |
| <i>Paenibacillus urinalis</i>           | NP            | 17<br>(0.91)  | NP        | NP              | NP             | NP             | NP     | 0-17         | -                         | Human (urin)                                 |
| <i>Pantoea agglomerans</i>              | NP            | NP            | NP        | THI             | NP             | NP             | NP     | NP           | 2 (CH)                    | Plants, animals (insects), dust              |
| <i>Paracoccus yeei</i>                  | NP            | 34<br>(1.83)  | 50 (3.18) | 17<br>(0.45)    | NP             | NP             | 0-50   | 0-34         | 2 (AU)                    | Soil, brines                                 |
| <i>Pseudomonas<br/>antarctica</i>       | NP            | NP            | NP        | NP              | NP             | 17<br>(0.79)   | NP     | 0-17         | 2 (AU)                    | Aquatic, soil, ice, cyanobacterial<br>mats   |
| <i>Pseudomonas<br/>extremorientalis</i> | NP            | NP            | NP        | NP              | NP             | 33<br>(1.53)   | NP     | 0-33         | 2 (AU)                    | Aquatic, soil, plants                        |
| <i>Pseudomonas<br/>fluorescens</i>      | NP            | NP            | NP        | NP              | THI            | NP             | NP     | NP           | 2 (AU)                    | Soil, plants, humans, animals                |
| <i>Pseudomonas syringae</i>             | NP            | NP            | NP        | NP              | 33 (2.94)      | NP             | 0-33   | NP           | 2 (AU)                    | Plants                                       |
| <i>Pseudomonas tolaasii</i>             | NP            | NP            | NP        | NP              | NP             | 33<br>(1.53)   | NP     | 0-33         | 2 (AU)                    | Mushrooms                                    |
| <i>Rahnella aquatilis</i>               | NP            | NP            | NP        | NP              | 30 (2.67)      | NP             | 0-30   | NP           | -                         | Aquatic, plants                              |
| <i>Rhizobium rubi</i>                   | NP            | NP            | NP        | NP              | NP             | 17<br>(0.79)   | NP     | 0-17         | -                         | Plants, soil                                 |
| <i>Rhodococcus<br/>erythropolis</i>     | NP            | 50<br>(2.68)  | NP        | NP              | NP             | NP             | NP     | 0-50         | -                         | Soil, seawater, sediments                    |
| <i>Rhodococcus fascians</i>             | NP            | NP            | 17 (1.08) | NP              | NP             | NP             | 0-17   | NP           | -                         | Plants                                       |
| <i>Roseomonas mucosa</i>                | 9 (0.75)      | NP            | NP        | NP              | 17 (1.51)      | 17<br>(0.79)   | 0-17   | 0-17         | -                         | Humans (skin)                                |
| <i>Rothia aeria</i>                     | NP            | NP            | NP        | 33<br>(0.87)    | NP             | NP             | NP     | 0-33         | -                         | Air, humans (oral mucosa)                    |
| <i>Staphylococcus capitis</i>           | NP            | 33<br>(1.77)  | 3 (0.19)  | NP              | NP             | NP             | 0-3    | 0-33         | -                         | Animals, humans (skin, scalp)                |

|                                       |           |            |           |            |           |           |       |       |                     |                                                                       |
|---------------------------------------|-----------|------------|-----------|------------|-----------|-----------|-------|-------|---------------------|-----------------------------------------------------------------------|
| <i>Staphylococcus epidermidis</i>     | 17 (1.41) | 167 (8.96) | 17 (1.08) | NP         | 34 (3.03) | 33 (1.53) | 17-34 | 0-167 | 2 (BE, CH, DE)      | Animals, humans (skin, nasopharynx), fermented sausages               |
| <i>Staphylococcus equorum</i>         | NP        | 84 (4.51)  | NP        | 116 (3.06) | NP        | NP        | NP    | 0-116 | -                   | Fermented food, animals (horses, cattle)                              |
| <i>Staphylococcus haemolyticus</i>    | NP        | 6 (0.32)   | NP        | 17 (0.45)  | NP        | NP        | NP    | 0-17  | 2 (CH, DE)          | Fermented food, milk, animals (horses, cattle, cats), humans (skin)   |
| <i>Staphylococcus hominis</i>         | NP        | NP         | NP        | NP         | 41 (3.65) | NP        | 0-41  | NP    | -                   | Fermented food, goat milk, animals (cats, dogs, goats), humans (skin) |
| <i>Staphylococcus lugdunensis</i>     | NP        | 17 (0.91)  | NP        | 33 (0.87)  | NP        | NP        | NP    | 0-33  | 2 (BE, CH, DE)      | Animals (cats, dogs), humans (skin)                                   |
| <i>Staphylococcus saprophyticus</i>   | NP        | NP         | NP        | 17 (0.45)  | NP        | 17 (0.79) | NP    | 0-17  | 2 (BE, CA, CH, DE)  | Animals (horses, cattle), humans (skin)                               |
| <i>Staphylococcus warneri</i>         | THI       | THI        | 5 (0.32)  | 8 (0.21)   | 3 (0.27)  | 4 (0.19)  | 0-5   | 4-5   | -                   | Fermented food, animals (cats, dogs, horses), humans (skin)           |
| <i>Streptococcus mitis</i>            | 17 (1.41) | NP         | NP        | NP         | NP        | NP        | 0-17  | NP    | 2 (BE, CH, DE, NIH) | Humans (oropharynx)                                                   |
| <i>Streptococcus pseudopneumoniae</i> | NP        | NP         | NP        | 301 (7.94) | NP        | NP        | NP    | 0-301 | -                   | Humans (oropharynx)                                                   |
| <i>Streptomyces lavendulae</i>        | 33 (2.75) | NP         | NP        | NP         | NP        | NP        | 0-33  | NP    | -                   | Soil                                                                  |

BE—Belgium; CA—Canada; CH—Switzerland; DE—Germany; NIH—National Institutes of Health; THI—Thioglycollate broth; NP—not present

**Tabela S5:** Fungal isolates (MALDI Score  $\geq 2.00$ ) from the sampling sites Lepe jame and Vivarium in Postojnska jama and from the sampling site Šotor in Škocjanske jame, their risk group assignment and typical habitat. Concentrations (CFU/m<sup>3</sup>) and percentages (%) of isolates based on flow cytometry results.

| Fungal isolates                     | Lepe jame                      |                | Vivarium                       |                | Šotor                          |                | Locations Combined          |                | Risk Group             | Typical habitat                                           |
|-------------------------------------|--------------------------------|----------------|--------------------------------|----------------|--------------------------------|----------------|-----------------------------|----------------|------------------------|-----------------------------------------------------------|
|                                     | Fungi (CFU/m <sup>3</sup> (%)) |                | Fungi (CFU/m <sup>3</sup> (%)) |                | Fungi (CFU/m <sup>3</sup> (%)) |                | Fungi (CFU/m <sup>3</sup> ) |                |                        |                                                           |
|                                     | Before tourists                | After tourists | Before tourists                | After tourists | Before tourists                | After tourists | Before tourists             | After tourists |                        |                                                           |
| <i>Aspergillus fumigatus</i> *      | 17 (1.41)                      | NP             | NP                             | NP             | NP                             | NP             | 0-17                        | NP             | 2 (AU, CA, CH, DE, EU) | Ubiquitous, air, dust, plants                             |
| <i>Aspergillus versicolor</i> *     | NP                             | NP             | 217 (13.79)                    | 267 (7.04)     | NP                             | NP             | 0-217                       | 0-267          | 2 (UK)                 | Ubiquitous, air, dust, plants                             |
| <i>Aureobasidium pullulans</i>      | 33 (2.75)                      | NP             | NP                             | NP             | NP                             | 17 (0.79)      | 0-33                        | 0-17           | -                      | Ubiquitous, plants                                        |
| <i>Cutaneotrichosporon curvatum</i> | NP                             | NP             | NP                             | 7 (0.18)       | NP                             | 75 (3.47)      | NP                          | 0-82           | -                      | Air, aquatic, wood, food                                  |
| <i>Debaryomyces hansenii</i>        | NP                             | NP             | NP                             | 33 (0.87)      | NP                             | NP             | NP                          | 0-33           | -                      | Seawater, fermented food                                  |
| <i>Naganishia diffluens</i>         | NP                             | THI            | NP                             | THI            | NP                             | NP             | NP                          | NP             | -                      | Air, aquatic, wood, food, humans (skin)                   |
| <i>Naganishia liquefaciens</i>      | NP                             | NP             | 2 (0.13)                       | NP             | NP                             | 50 (2.31)      | 0-2                         | 0-50           | -                      | Air, aquatic, wood, food, humans (skin)                   |
| <i>Paecilomyces variotii</i> *      | NP                             | 17 (0.91)      | NP                             | NP             | NP                             | NP             | NP                          | 0-17           | 2 (BE, CH, DE)         | Air, wood, soil, food                                     |
| <i>Rhodotorula mucilaginosa</i>     | NP                             | NP             | NP                             | 1 (0.03)       | NP                             | 33 (1.53)      | NP                          | 0-34           | 1 (DE)                 | Air, soil, food (cheese, milk), humans (skin, oropharynx) |
| All Fungi                           | 50 (4.16)                      | 17 (0.91)      | 219 (13.91)                    | 308 (8.13)     | NP                             | 175 (8.10)     | 0-217                       | 0-267          | -                      | -                                                         |

BE – Belgium; CA – Canada; CH – Switzerland; DE – Germany; EU – European Union; NIH – National Institutes of Health; THI – Thioglycollate broth; NP – not present

\* Identification is based on the morphological characteristics of the isolates.
